# Supplementary material
Source: PubMed Central journal article supplement (PMC2583299)
Supplement: M805832200_1.pdf [file M805832200_1.pdf]

**Table S1. Mean and maximum life spans of G6PD transgenic male flies**

| Genotype            | Mean (Days)   | % vs. Responder/+ | % vs. Driver/+ | ‡Maximum (Days) |
|---------------------|---------------|-------------------|----------------|-----------------|
| <b>+/G6PD 4c</b>    | <b>62.532</b> |                   |                | <b>75</b>       |
| +/G6PD 5f           | 62.266        |                   |                | 73              |
| +/G6PD 7b           | 66.439        |                   |                | 74              |
| +/G6PD 9g           | 66.463        |                   |                | 75              |
| <b>armadillo/+</b>  | <b>57.615</b> |                   |                | <b>66</b>       |
| <b>armadillo/4c</b> | <b>83.626</b> | <b>34**</b>       | <b>45**</b>    | <b>98</b>       |
| armadillo/5f        | 68.584        | 10*               | 19**           | 82              |
| armadillo/7b        | 86.158        | 30**              | 50**           | 102             |
| armadillo/9g        | 90.226        | 36**              | 57**           | 102             |
| <hr/>               |               |                   |                |                 |
| <b>+/G6PD 4c</b>    | <b>58.847</b> |                   |                | <b>69</b>       |
| +/G6PD 5f           | 59.182        |                   |                | 69              |
| +/G6PD 7b           | 64.836        |                   |                | 76              |
| +/G6PD 9g           | 64.340        |                   |                | 74              |
| <b>Tubulin/+</b>    | <b>63.567</b> |                   |                | <b>75</b>       |
| <b>Tubulin/4c</b>   | <b>80.640</b> | <b>37**</b>       | <b>27**</b>    | <b>97</b>       |
| Tubulin/5f          | 81.761        | 38**              | 29**           | 101             |
| Tubulin/7b          | 80.928        | 25**              | 27**           | 100             |
| Tubulin/9g          | 77.254        | 20**              | 22**           | 92              |
| <hr/>               |               |                   |                |                 |
| <b>+/G6PD 4c</b>    | <b>60.892</b> |                   |                | <b>76</b>       |
| +/G6PD 5f           | 71.072        |                   |                | 92              |

Overexpression of G6PD extends life span

|            |        |      |      |     |
|------------|--------|------|------|-----|
| Tubulin/+  | 69.715 |      |      | 88  |
| Tubulin/4c | 80.803 | 23** | 16*  | 96  |
| D42/+      | 70.220 |      |      | 80  |
| D42/4c     | 78.175 | 19** | 11*  | 95  |
| D42/5f     | 75.044 | 6    | 7*   | 93  |
| D42/7b     | 74.820 | 18** | 7    | 95  |
| <hr/>      |        |      |      |     |
| +/G6PD 4c  | 67.699 |      |      | 80  |
| +/G6PD 5f  | 71.047 |      |      | 89  |
| +/G6PD 7b  | 69.378 |      |      | 85  |
| +/G6PD 9g  | 69.505 |      |      | 85  |
| Appl/+     | 72.087 |      |      | 91  |
| Appl/4c    | 76.393 | 13*  | 6    | 98  |
| Appl/5f    | 77.009 | 8*   | 7    | 95  |
| Appl/7b    | 80.537 | 16** | 12*  | 100 |
| Appl/9g    | 72.751 | 5    | 1    | 90  |
| D42/+      | 63.324 |      |      | 82  |
| D42/9g     | 70.982 | 2    | 12*  | 86  |
| <hr/>      |        |      |      |     |
| +/G6PD 4c  | 70.047 |      |      | 87  |
| +/G6PD 5f  | 73.232 |      |      | 90  |
| +/G6PD 7b  | 71.659 |      |      | 87  |
| +/G6PD 9g  | 76.155 |      |      | 94  |
| da/+       | 56.124 |      |      | 64  |
| da/4c      | 74.098 | 6    | 32** | 95  |
| da/5f      | 76.124 | 4    | 36** | 98  |

## Overexpression of G6PD extends life span

|              |        |      |      |     |
|--------------|--------|------|------|-----|
| C23/9g       | 82.164 | 33** | 27** | 93  |
| Tubulin/+    | 78.378 |      |      | 100 |
| Tubulin/4c   | 84.868 | 23** | 8    | 100 |
| Tubulin/5f   | 86.546 | 48** | 10   | 102 |
| Tubulin/7b   | 79.235 | 9    | 1    | 99  |
| Tubulin/9g   | 91.076 | 48** | 16*  | 103 |
| <hr/>        |        |      |      |     |
| +/G6PD 4c    | 58.834 |      |      | 66  |
| +/G6PD 5f    | 59.889 |      |      | 72  |
| +/G6PD 7b    | 59.146 |      |      | 68  |
| armadillo/+  | 55.651 |      |      | 67  |
| armadillo/4c | 72.397 | 23** | 30** | 85  |
| armadillo/5f | 69.373 | 16** | 25** | 84  |
| armadillo/7b | 81.813 | 38** | 47** | 95  |
| <hr/>        |        |      |      |     |
| †G6PD 5f/+   | 56.150 |      |      | 69  |
| †G6PD 7b/+   | 72.029 |      |      | 85  |
| †G6PD 9g/+   | 66.756 |      |      | 84  |
| †+/Tubulin   | 72.759 |      |      | 87  |
| †5f/Tubulin  | 75.867 | 35** | 4    | 92  |
| †7b/Tubulin  | 77.962 | 8*   | 7    | 93  |
| †9g/Tubulin  | 74.827 | 12*  | 3    | 88  |
| <hr/>        |        |      |      |     |
| +/G6PD 4c    | 65.540 |      |      | 80  |
| +/G6PD 5f    | 70.466 |      |      | 86  |
| +/G6PD 7b    | 63.232 |      |      | 80  |

## Overexpression of G6PD extends life span

|                |               |             |             |            |
|----------------|---------------|-------------|-------------|------------|
| +/G6PD 7b      | 65.159        |             |             | 85         |
| +/G6PD 9g      | 61.681        |             |             | 81         |
| <b>Appl/+</b>  | <b>70.608</b> |             |             | <b>91</b>  |
| <b>Appl/4c</b> | <b>81.795</b> | <b>34**</b> | <b>16**</b> | <b>100</b> |
| Appl/5f        | 78.439        | 10*         | 11*         | 97         |
| Appl/7b        | 75.062        | 15*         | 6           | 96         |
| Appl/9g        | 73.676        | 19**        | 4           | 96         |
| D42/+          | 67.131        |             |             | 88         |
| D42/4c         | 78.971        | 30**        | 18**        | 99         |
| D42/5f         | 75.769        | 7           | 13*         | 95         |
| D42/7b         | 76.495        | 17**        | 14*         | 94         |
| D42/9g         | 74.344        | 20**        | 11*         | 91         |
| <hr/>          |               |             |             |            |
| +/G6PD 4c      | 69.019        |             |             | 84         |
| +/G6PD 5f      | 58.415        |             |             | 69         |
| +/G6PD 7b      | 73.000        |             |             | 91         |
| +/G6PD 9g      | 61.605        |             |             | 73         |
| da/+           | 61.699        |             |             | 74         |
| da/4c          | 78.061        | 13**        | 27**        | 91         |
| da/5f          | 69.740        | 19**        | 13*         | 81         |
| da/7b          | 80.509        | 10*         | 30**        | 93         |
| da/9g          | 76.739        | 25**        | 24**        | 91         |
| C23/+          | 64.493        |             |             | 74         |
| C23/4c         | 74.880        | 8*          | 16**        | 91         |
| C23/5f         | 69.189        | 18**        | 7           | 90         |
| C23/7b         | 82.416        | 13**        | 28**        | 96         |

Overexpression of G6PD extends life span

|        |        |     |             |    |
|--------|--------|-----|-------------|----|
| da/7b  | 80.833 | 13* | <b>44**</b> | 99 |
| da/9g  | 77.606 | 2   | <b>38**</b> | 98 |
| C23/+  | 63.842 |     |             | 87 |
| C23/4c | 76.409 | 9   | 20*         | 95 |
| C23/5f | 79.705 | 9   | <b>25**</b> | 97 |
| C23/7b | 81.963 | 14* | <b>28**</b> | 98 |
| C23/9g | 78.023 | 2   | <b>22**</b> | 95 |

---

\* $P < 0.05$  in comparison with the corresponding driver/+ or +/responder control genotype.

\*\* $P < 0.0005$ . Genotypes between dividing lines were assayed simultaneously. Boldface type indicates cohorts for which survivorship curves are presented in Fig. 1. Note: the background was *y w* for all flies.

†Parents switched in this experiment.

‡ Maximum survival time denotes the last age at which  $\geq 10\%$  of the flies remained alive.
